# Supplementary material for: The molecular basis of pyrazinamide activity on Mycobacterium tuberculosis PanD
Source: PubMed Central journal article supplement (PMC6969166; doi:10.1038/s41467-019-14238-3), 2020-01-17
Supplement: 41467_2019_14238_MOESM1_ESM.pdf [file 41467_2019_14238_MOESM1_ESM.pdf]

1  
2  
3  
4  
5  
6  
7  
8  
9  
10  
11  
12  
13

## Supplementary Information

### **The molecular basis of Pyrazinamide activity on *Mycobacterium tuberculosis* PanD**

Q.Sun *et al*

## 1 **Supplementary Note 1**

2 The apo *Mtb* PanD crystals are in the P4<sub>1</sub>2<sub>1</sub>2 space group and diffracted to 2.7 Å. These crystals  
3 were soaked in cryo-protectant with 10 mM POA . The structure was solved with molecular  
4 replacement using the *Mtb* PanD structure (pdb 2C45). After manual model building and  
5 refinement, the Rfactor and Rfree (%) are 20.30 /24.88 and 19.92/24.78 for both apo and POA-  
6 complex structures, respectively (**Supplementary Table 1**).

7 There are six copies of *Mtb* PanD in one asymmetric unit. The electron density of the active site  
8 residues indicated that all the PanD molecules in the crystal are cleaved and processed into  
9 separate β and α chain, as there was clear density for the pyrolyl modification and the cleavage  
10 between residues Gly24 and Ser25. There was no electron density observed for the last 24 amino  
11 acid residues (Asp116 – Gly139) and the C-terminal His-tag. Thus, each copy contains the β  
12 chain (Met1-Gly24) and α chain (Pyr25-Ile115).

13 The 6-Cl-POA complex crystal was prepared by co-crystallizing *Mtb* PanD protein in presence  
14 of 20 mM 6-Cl-POA. The crystals were in the P3<sub>1</sub> space group and diffracted to 2.25 Å  
15 resolution. The structure was obtained using molecular replacement. It was refined to an  
16 Rwork/Rfree (%) of 13.39/16.43. There are 12 copies of PanD protein in one asymmetric unit,  
17 which form three tetramers. The structures are very similar with an rmsd of the c-alpha between  
18 these tetramers are 0.24 Å, 0.37 Å, and 0.35 Å. The first tetramer (chains A-H) was used in the  
19 structure description.

20 The PanD mutant M117I was crystallized in the I422 space group. The crystal diffracted to 2.33  
21 Å resolution. The structure was refined to Rwork/Rfree (%) as 17.43/20.38. There is a single  
22 PanD in one asymmetric unit, and the tetramer is formed through crystallographic symmetry.  
23 The model comprises the first 126 residues. When M117I was superimposed onto wild-type  
24 protein, the rmsd for Cα is below 0.4 Å. The major difference in the structure occurred at the C-  
25 terminus of the short peptide (His21-Gly24). It may reflect the internal flexibility of this region.

1 **Supplementary Table 1. X-ray diffraction data collection and model refinement statistics †**

|                                                         | <i>Mtb</i> PanD (apo)             | POA:PanD                          | 6-Cl-POA:PanD                 | M117I PanD                     |
|---------------------------------------------------------|-----------------------------------|-----------------------------------|-------------------------------|--------------------------------|
| <b>Data collection</b>                                  |                                   |                                   |                               |                                |
| Space group                                             | P 4 <sub>1</sub> 2 <sub>1</sub> 2 | P 4 <sub>1</sub> 2 <sub>1</sub> 2 | P 3 <sub>1</sub>              | I 422                          |
| Cell dimensions                                         |                                   |                                   |                               |                                |
| <i>a</i> , <i>b</i> , <i>c</i> (Å)                      | 163.0, 163.0,<br>63.6             | 162.3, 162.3, 62.8                | 143.7, 143.7, 59.8            | 73.0, 73.0, 109.5              |
| $\alpha$ , $\beta$ , $\gamma$ (°)                       | 90, 90, 90                        | 90, 90, 90                        | 90, 90, 120                   | 90, 90, 90                     |
| Resolution (Å)                                          | 21.92 - 2.7<br>(2.797 - 2.7)*     | 21.75 - 2.7<br>(2.796 - 2.7)      | 21.89 - 2.25<br>(2.33 - 2.25) | 36.51 - 2.33<br>(2.414 - 2.33) |
| <i>R</i> <sub>sym</sub> or <i>R</i> <sub>merge</sub>    | 0.104 (1.108)                     | 0.140 (1.455)                     | 0.114 (0.545)                 | 0.151 (0.495)                  |
| <i>I</i> / $\sigma$ <i>I</i>                            | 15.70 (2.08)                      | 16.48 (2.31)                      | 8.03 (1.90)                   | 18.88 (3.75)                   |
| Completeness (%)                                        | 99.60 (98.85)                     | 99.70 (99.87)                     | 99.53 (96.47)                 | 99.58 (96.95)                  |
| Redundancy                                              | 10.4 (10.8)                       | 15.7 (15.5)                       | 5.7 (4.9)                     | 11.3 (5.4)                     |
| <b>Refinement</b>                                       |                                   |                                   |                               |                                |
| Resolution (Å)                                          | 21.92 - 2.7<br>(2.797 - 2.7)      | 21.75 - 2.7<br>(2.796 - 2.7)      | 21.89 - 2.25<br>(2.33 - 2.25) | 36.51 - 2.33<br>(2.414 - 2.33) |
| No.reflections<br>(total/unique)                        | 249355 / 24034                    | 369329 / 23578                    | 373985 / 65250                | 74868 / 6633                   |
| <i>R</i> <sub>work</sub> / <i>R</i> <sub>free</sub> (%) | 20.30 / 24.88                     | 19.92 / 24.78                     | 13.39 / 16.43                 | 17.43 / 20.38                  |
| No. atoms                                               | 5247                              | 5296                              | 10543                         | 1002                           |
| Protein                                                 | 5194                              | 5203                              | 10356                         | 947                            |
| Ligand/ion                                              | 30                                | 84                                | 180                           | 16                             |
| Water                                                   | 23                                | 9                                 | 7                             | 39                             |
| <i>B</i> -factors (Å <sup>2</sup> )                     |                                   |                                   |                               |                                |
| Protein                                                 | 69.4                              | 61.3                              | 55.48                         | 38.96                          |
| Ligand/ion                                              | 75.2                              | 64.4                              | 59.80                         | 61.26                          |
| Water                                                   | 41.8                              | 39.0                              | 45.93                         | 43.43                          |
| R.m.s. deviations                                       |                                   |                                   |                               |                                |
| Bond lengths (Å)                                        | 0.013                             | 0.013                             | 0.015                         | 0.006                          |
| Bond angles (°)                                         | 1.68                              | 1.68                              | 1.80                          | 0.92                           |
| Ramachandran                                            |                                   |                                   |                               |                                |
| Favoured (%)                                            | 98.19                             | 99.55                             | 99.77                         | 98.35                          |
| allowed (%)                                             | 1.81                              | 0.45                              | 0.23                          | 1.65                           |

2 † The table was generated with Phenix "Table 1" function.

3 \*Values in parentheses are for highest-resolution shell.

4

5

6

1 **Supplementary Table 2. Primers used for mutagenesis**

| <b>Primer</b> | <b>Sequence</b>                     |
|---------------|-------------------------------------|
| H21R-f        | ccgacctgcgcTACGTCGGCTCGGTGACC       |
| H21R-r        | agccgacgtagcgCAGGTCGGCGCAGG         |
| M117I-f       | aaaccgatcgacataGGCCACGATCCGGCATTGTG |
| M117I-r       | atcgtggcctatGTCGATCGGTTTGTGTAAGCG   |

2

3

4

1

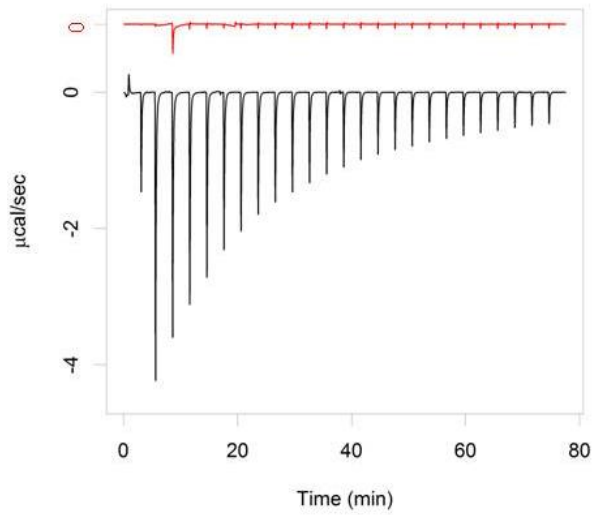

2

3 **Supplementary Figure 1. Isothermal titration calorimetry result for titration of POA into**

4 ***Mtb* PanD.** The black trace shows the heat released from the titration of 20 mM POA against 0.5

5 mM *Mtb* PanD in 100 mM Tris pH 7.5. In red curve is the titration of 20 mM POA in 100 mM

6 Tris buffer pH 7.5 in the same scale of the POA-to-PanD curve. The POA stock was also in 100

7 mM Tris pH 7.5. From five separate experiments, it was calculated that  $K_d = 0.71 (0.03)$  mM,  $\Delta H$

8  $= -4200 (200)$  cal/mol,  $\Delta S = 0.1 (0.7)$  cal/mol/deg

9

1

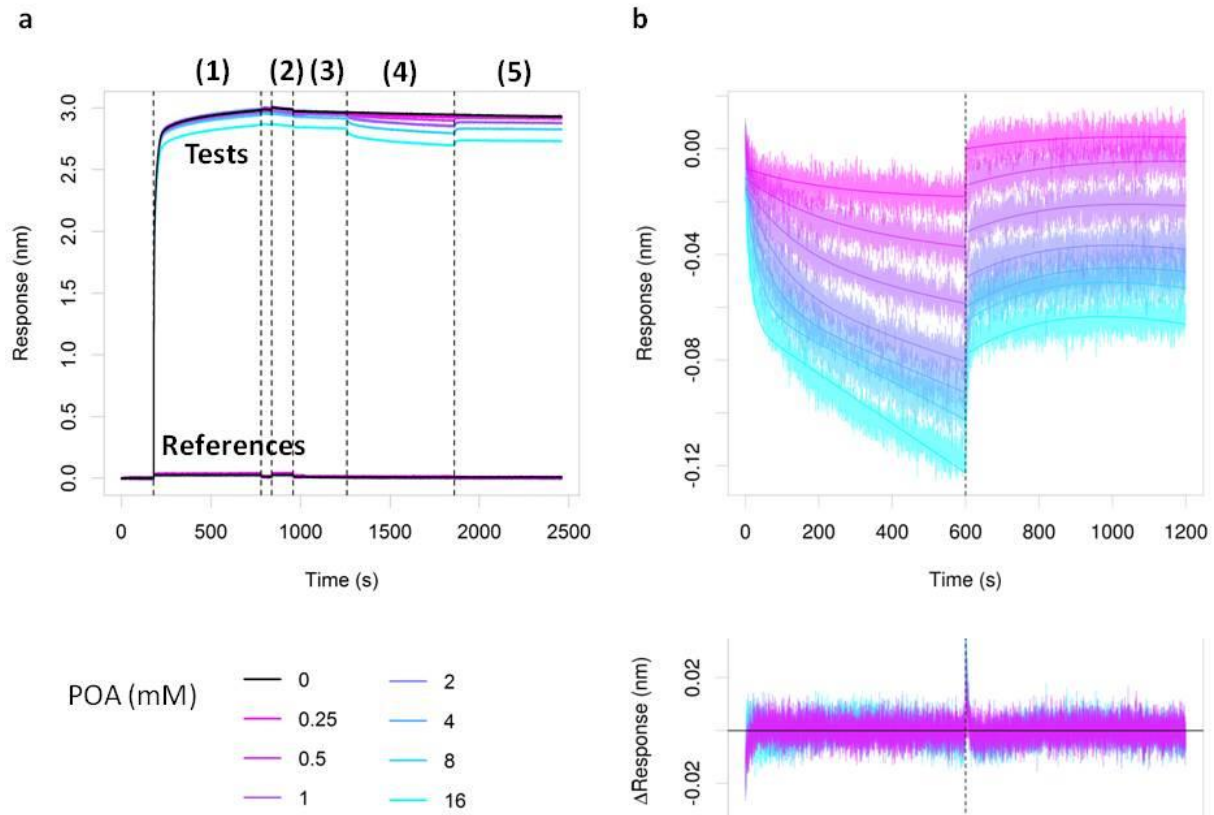

2

3 **Supplementary Figure 2. POA binds to *Mtb* PanD slowly but tightly.** a. Raw data of a typical

4 BLI run. The top 8 curves were the raw data with the test biosensors loaded with biotinylated *Mtb*

5 PanD; the bottom 8 overlapped curves were signals from reference biosensors loaded with biocytin

6 instead. The critical steps are labeled: (1) Load, (2) Block, (3) Baseline, (4) Association, (5)

7 Dissociation. Details are described in **Methods**. b. Fitting of association-then-dissociation of the

8 BLI data. The top panel is the processed BLI sensorgram of *Mtb* PanD binding to POA. The

9 residuals from the fitting are shown in the bottom panel.  $k_{on}$  was measured in triplicate as 3.5 (0.6)

10  $M^{-1}s^{-1}$ ,  $k_{off}$  as 0.0027 (0.0001)  $s^{-1}$ .  $K_d$  was derived as 0.8 (0.1) mM.

1

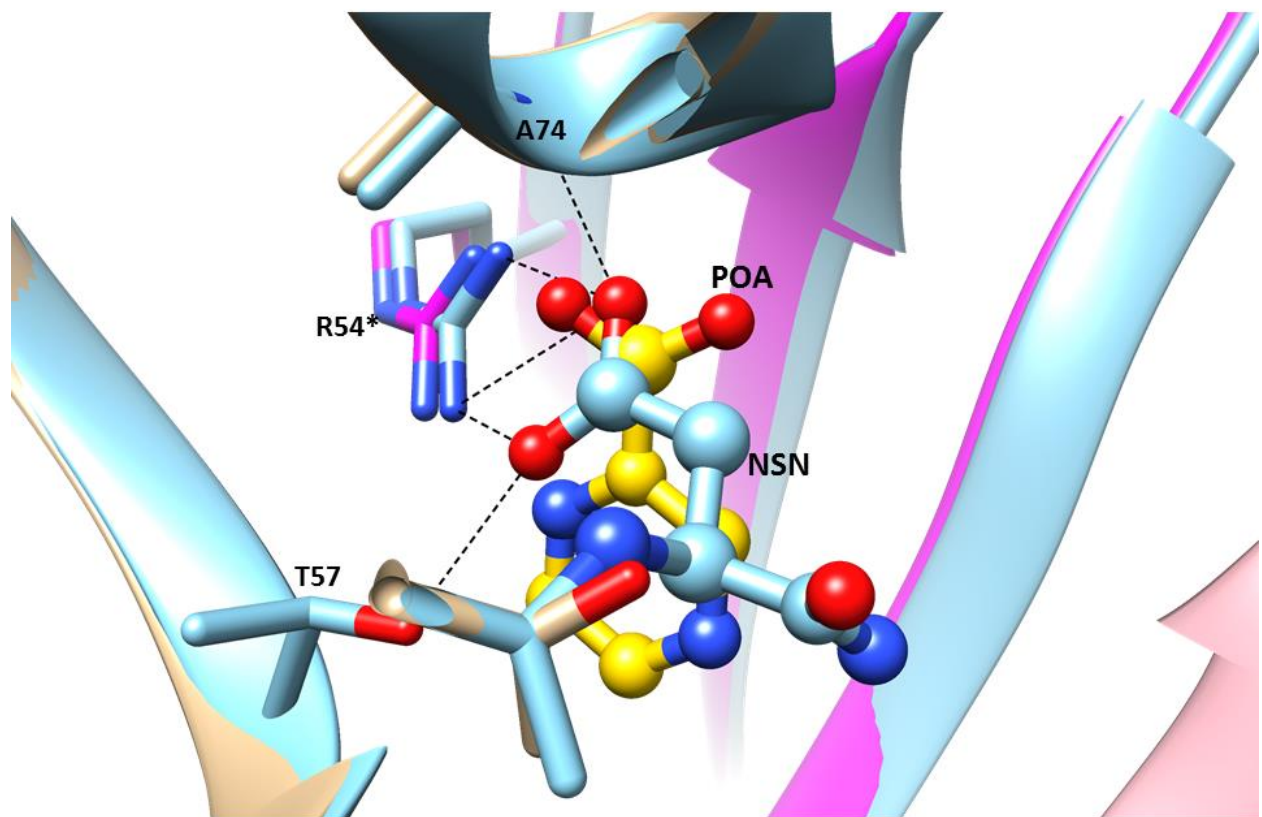

2

3 **Supplementary Figure 3. POA binds to the PanD active site.** The two subunits of *Mtb* PanD  
4 tetramer are shown in tan and magenta ribbons, respectively. POA is located in the active site at  
5 the interface of these two subunits, and is shown with carbon atoms in yellow. Superimposed is  
6 the crystal structure of *H. pylori* PanD with isoasparagine (NSN), a substrate analog (pdb 1UHE).  
7 *H. pylori* PanD is shown in cyan. Both NSN and POA are in ball-and-stick. The hydrogen bond  
8 with NSN are shown as dashes, Arg54\*, Thr57 and Ala74.
